# Supplementary material for: Preparation of gold nanostars covered with platinum particles and their photoelectrocatalysis properties
Source: Royal Society of Chemistry journal article supplement (doi:10.1039/d3ce00999h), 2023-01-01
Supplement: d3ce00999h1.pdf [file d3ce00999h1.pdf]

## Electronic Supplementary Information

### Preparation of gold nanostars covered with platinum particles and their photoelectrocatalysis properties

Lihui Xu,<sup>a</sup> Juan Xu,<sup>a</sup> Xin Wang,<sup>a</sup> Xingzhong Zhu,<sup>\*a,b</sup> and Caixia Kan<sup>\*a,b</sup>

<sup>a</sup> College of Physics, Nanjing University of Aeronautics and Astronautics, Nanjing 211106, China.

<sup>b</sup> Key Laboratory of Aerospace Information Materials and Physics (NUAA), MIIT, Nanjing 211106, China.

E-mail: xzzhu@nuaa.edu.cn; cxkan@nuaa.edu.cn

### Supplementary figures

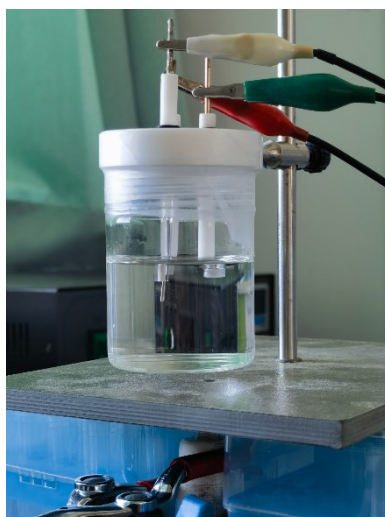

**Fig. S1** The light test setup in a normal environment.

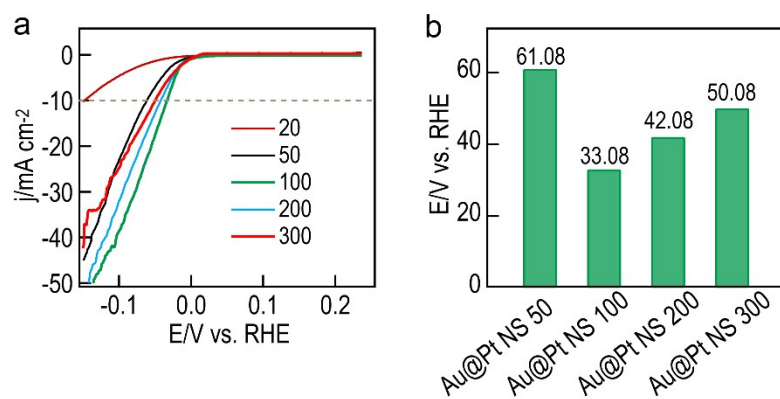

**Fig. S2** (a) LSV curves without light by Au@Pt NS of various Au/Pt ratio samples. (b) Bar graph of the overpotential ( $\eta$ , at 10 mA cm<sup>-2</sup> HER current density) of Au@Pt NS of various Au/Pt ratio samples.

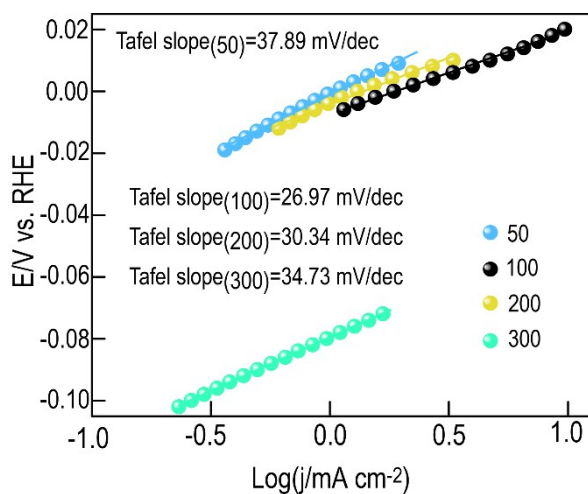

**Fig. S3** The corresponding Tafel plots by Au@Pt NS of various Au/Pt ratio samples.

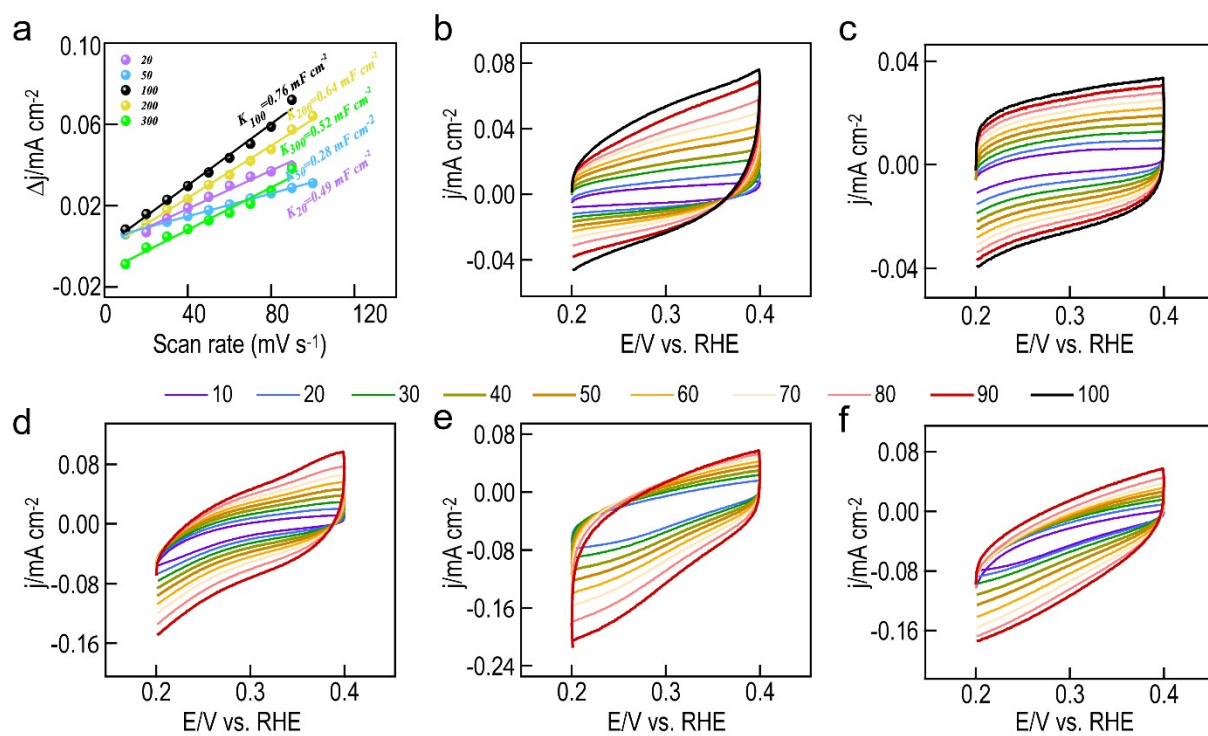

**Fig. S4** The corresponding cyclic voltammetry plots by Au@Pt NS of various Au/Pt ratio samples.
